# Supplementary material for: Mindfulness-Based Cognitive Therapy, Acceptance and Commitment Therapy, and Positive Psychotherapy for Major Depression
Source: Atypon-hosted journal article supplement (doi:10.1176/appi.psychotherapy.20200006), 2020-09-28

### Supplemental Material

### Preferred Reporting Items for Systematic Reviews (PRISMA) 2009 Flow Diagram

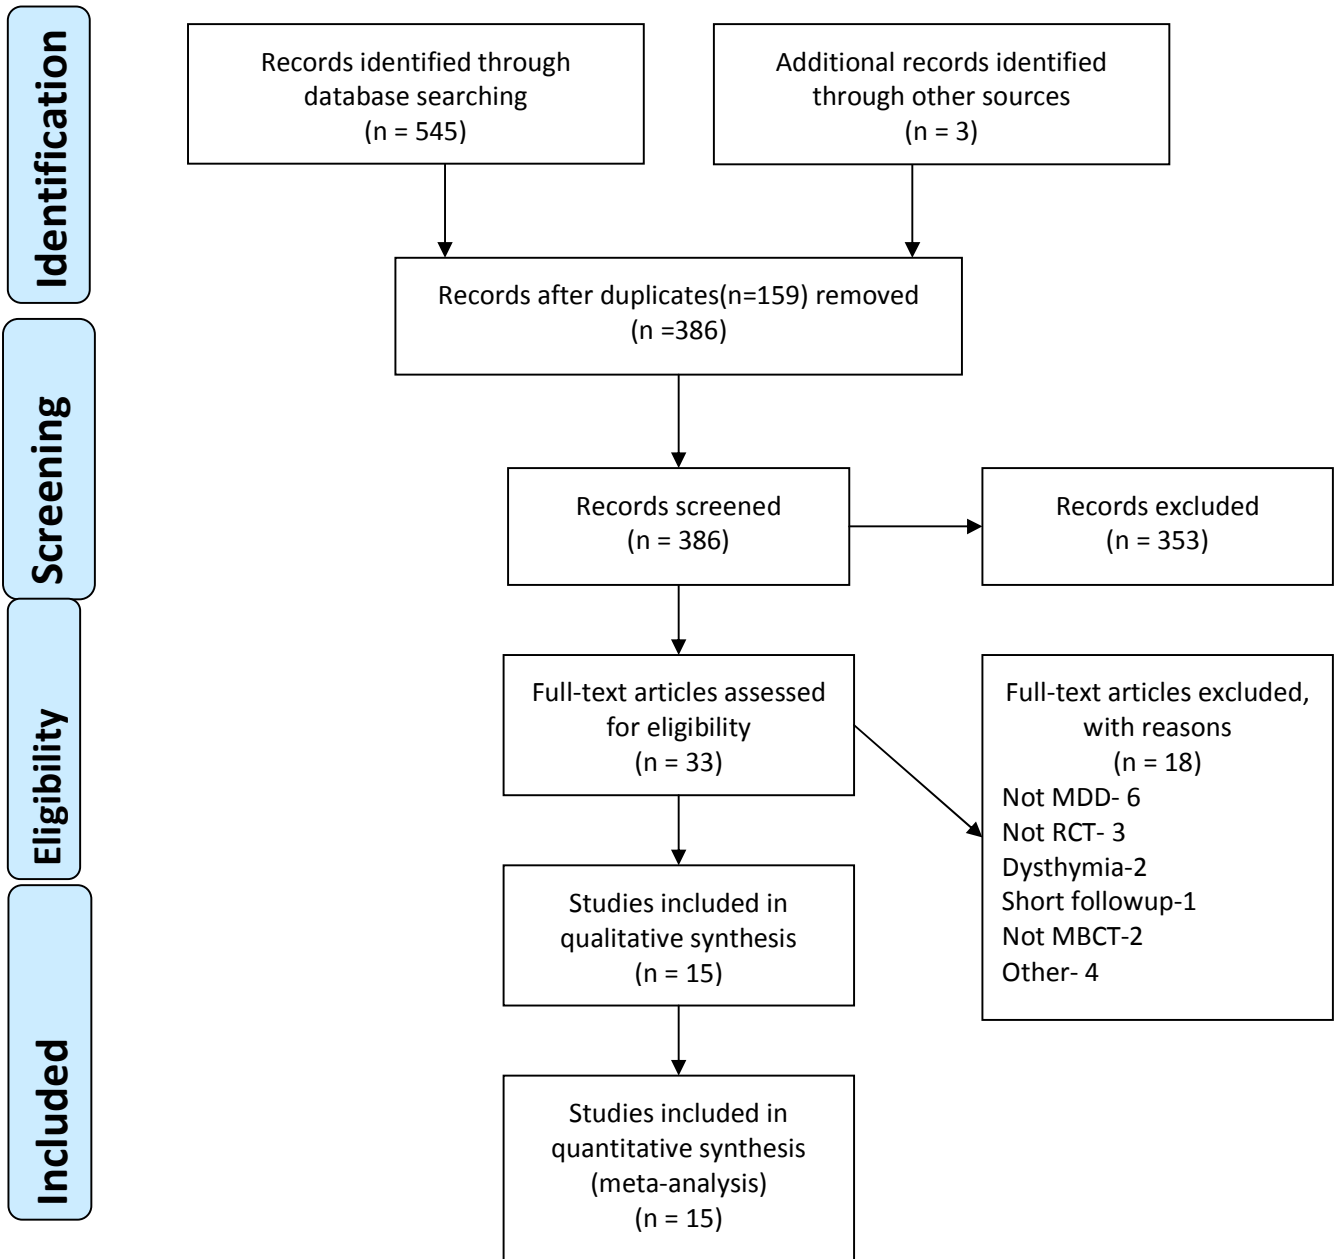

Supplement: appi.psychotherapy.20200006.ds001.pdf [file appi.psychotherapy.20200006.ds001.pdf]
